# Supplementary material
Source: publisher figshare collection journal article supplement (https://sage.figshare.com/ndownloader/files/32394681)
Supplement: Supplementary file 1 [file 32394681]

CFA\_SD\_REVISE.amw


#### D:\FACULTY\RESEARCH\COVID 19\DATA\CFA\_SD\_REVISE.amw

##### Analysis Summary

##### Date and Time

Date: Saturday, January 23, 2021

Time: 9:08:15 PM

##### Title

Cfa\_sd\_revise: Saturday, January 23, 2021 9:08 PM

##### Groups

##### Group number 1 (Group number 1)

##### Notes for Group (Group number 1)

The model is recursive.

Sample size = 324

##### Variable Summary (Group number 1)

##### Your model contains the following variables (Group number 1)

Observed, endogenous variables

DN\_SD1

DN\_SD2

DN\_SD3

RE\_SD1

RE\_SD2

RE\_SD3

RE\_SD4

SE\_SD1

SE\_SD2

SE\_SD3

SE\_SD4

SE\_SD5

IN\_SD3

BI\_SD1

BI\_SD2

BI\_SD3

Severity4

Severity3

Severity2

Severity1

Susceptib4

Susceptib3

Susceptib2

Susceptib1

IN\_SD4

SE\_SD6R

BEHAVIOR\_SD\_5

BEHAVIOR\_SD\_3

BEHAVIOR\_SD\_2

BEHAVIOR\_SD\_1

Unobserved, endogenous variables

RES\_CLEAN

SEF\_CLEAN

SEV

SUS

Unobserved, exogenous variables

DES\_CLEAN

e2

e3

e4

e5

e6

e7

e8

e9

e10

e11

e12

e13

EFF\_CLEAN

e14

e15

INJ\_CLEAN

e18

INTENT\_CLEAN

e19

e20

e21

e32

e33

e34

e35

e36

e37

e38

e39

e40

e41

RI\_CLEAN

e43

e44

BE\_SD

e45

e46

e47

e48

##### Variable counts (Group number 1)

|  |  |
| --- | --- |
| Number of variables in your model: | 74 |
| Number of observed variables: | 30 |
| Number of unobserved variables: | 44 |
| Number of exogenous variables: | 40 |
| Number of endogenous variables: | 34 |

##### Parameter Summary (Group number 1)

|  | Weights | Covariances | Variances | Means | Intercepts | Total |
| --- | --- | --- | --- | --- | --- | --- |
| Fixed | 44 | 0 | 0 | 0 | 0 | 44 |
| Labeled | 0 | 0 | 0 | 0 | 0 | 0 |
| Unlabeled | 24 | 15 | 40 | 0 | 0 | 79 |
| Total | 68 | 15 | 40 | 0 | 0 | 123 |

##### Sample Moments (Group number 1)

##### Sample Covariances (Group number 1)

|  | BEHAVIOR\_SD\_1 | BEHAVIOR\_SD\_2 | BEHAVIOR\_SD\_3 | BEHAVIOR\_SD\_5 | SE\_SD6R | IN\_SD4 | Susceptib1 | Susceptib2 | Susceptib3 | Susceptib4 | Severity1 | Severity2 | Severity3 | Severity4 | BI\_SD3 | BI\_SD2 | BI\_SD1 | IN\_SD3 | SE\_SD5 | SE\_SD4 | SE\_SD3 | SE\_SD2 | SE\_SD1 | RE\_SD4 | RE\_SD3 | RE\_SD2 | RE\_SD1 | DN\_SD3 | DN\_SD2 | DN\_SD1 |
| --- | --- | --- | --- | --- | --- | --- | --- | --- | --- | --- | --- | --- | --- | --- | --- | --- | --- | --- | --- | --- | --- | --- | --- | --- | --- | --- | --- | --- | --- | --- |
| BEHAVIOR\_SD\_1 | .701 |
| BEHAVIOR\_SD\_2 | .438 | .710 |
| BEHAVIOR\_SD\_3 | .400 | .450 | .694 |
| BEHAVIOR\_SD\_5 | .412 | .486 | .577 | .876 |
| SE\_SD6R | .221 | .315 | .412 | .379 | 3.892 |
| IN\_SD4 | .321 | .354 | .329 | .439 | .029 | 3.135 |
| Susceptib1 | .246 | .247 | .084 | .230 | -.332 | .338 | 3.225 |
| Susceptib2 | .098 | .206 | .111 | .200 | -.114 | .118 | 1.495 | 2.577 |
| Susceptib3 | .247 | .302 | .181 | .322 | .079 | .228 | 1.817 | 1.609 | 3.077 |
| Susceptib4 | .170 | .132 | .073 | .207 | -.211 | .298 | 1.896 | 1.302 | 1.928 | 2.755 |
| Severity1 | .396 | .347 | .404 | .422 | .216 | .540 | 1.243 | .620 | .916 | .724 | 2.997 |
| Severity2 | .289 | .321 | .393 | .433 | .345 | .577 | .399 | .287 | .397 | .274 | 1.015 | 1.804 |
| Severity3 | .322 | .397 | .423 | .413 | .226 | .432 | .598 | .556 | .611 | .322 | .768 | .962 | 1.631 |
| Severity4 | .417 | .424 | .371 | .481 | .064 | .730 | 1.692 | .842 | 1.164 | 1.137 | 2.028 | .966 | .852 | 3.091 |
| BI\_SD3 | .556 | .506 | .595 | .654 | .819 | .898 | .296 | .192 | .339 | .351 | .778 | .803 | .665 | .883 | 1.939 |
| BI\_SD2 | .557 | .474 | .621 | .686 | .728 | 1.023 | .339 | .071 | .268 | .358 | .813 | .821 | .695 | .931 | 1.578 | 2.000 |
| BI\_SD1 | .465 | .408 | .514 | .610 | .532 | .891 | .142 | -.021 | .081 | .268 | .647 | .727 | .602 | .767 | 1.452 | 1.455 | 1.816 |
| IN\_SD3 | .420 | .322 | .368 | .471 | .090 | 1.894 | .290 | .016 | .265 | .399 | .712 | .633 | .494 | .714 | .975 | 1.149 | .856 | 2.912 |
| SE\_SD5 | .458 | .438 | .463 | .452 | .513 | .656 | .232 | .209 | .206 | .175 | .596 | .701 | .785 | .659 | .937 | .893 | .887 | .552 | 1.232 |
| SE\_SD4 | .554 | .491 | .520 | .533 | .805 | .859 | .227 | .089 | .155 | .251 | .641 | .665 | .718 | .632 | 1.184 | 1.205 | 1.035 | .749 | 1.006 | 1.956 |
| SE\_SD3 | .523 | .371 | .492 | .597 | .735 | .733 | .198 | -.092 | .104 | .204 | .686 | .760 | .632 | .705 | 1.214 | 1.226 | .970 | .836 | .861 | 1.452 | 2.401 |
| SE\_SD2 | .449 | .437 | .510 | .576 | .555 | .660 | .304 | .173 | .214 | .243 | .656 | .686 | .743 | .719 | 1.060 | 1.154 | .986 | .711 | .945 | 1.166 | 1.173 | 1.446 |
| SE\_SD1 | .529 | .435 | .473 | .512 | .802 | .588 | .170 | -.106 | .039 | .171 | .708 | .643 | .646 | .619 | 1.158 | 1.180 | 1.027 | .612 | .913 | 1.575 | 1.624 | 1.138 | 2.168 |
| RE\_SD4 | .463 | .545 | .596 | .684 | .685 | .861 | .274 | .180 | .281 | .227 | .627 | .783 | .793 | .781 | 1.179 | 1.166 | 1.057 | .870 | .989 | 1.068 | .990 | 1.019 | 1.003 | 1.635 |
| RE\_SD3 | .487 | .537 | .544 | .657 | .623 | .933 | .202 | .180 | .262 | .168 | .655 | .826 | .730 | .764 | 1.336 | 1.273 | 1.280 | .961 | .906 | 1.127 | 1.037 | 1.049 | 1.014 | 1.280 | 1.762 |
| RE\_SD2 | .445 | .453 | .490 | .609 | .451 | .825 | .275 | .258 | .223 | .148 | .579 | .706 | .743 | .771 | 1.064 | 1.084 | .980 | .948 | .839 | .883 | .943 | .966 | .800 | 1.175 | 1.204 | 1.734 |
| RE\_SD1 | .423 | .478 | .503 | .559 | .463 | .855 | .275 | .238 | .399 | .230 | .662 | .731 | .807 | .759 | 1.072 | 1.051 | 1.066 | .812 | .958 | 1.042 | .999 | 1.049 | .922 | 1.203 | 1.321 | 1.145 | 1.753 |
| DN\_SD3 | .634 | .579 | .508 | .590 | .480 | .948 | .108 | .073 | .117 | .082 | .608 | .583 | .597 | .629 | 1.070 | 1.090 | 1.027 | .988 | .936 | 1.159 | 1.145 | 1.001 | 1.079 | 1.049 | 1.141 | 1.054 | 1.029 | 1.825 |
| DN\_SD2 | .542 | .508 | .432 | .547 | .268 | 1.049 | .127 | .069 | .222 | .113 | .611 | .581 | .645 | .587 | .876 | .964 | .871 | 1.042 | .790 | .915 | 1.018 | .863 | .891 | .901 | 1.030 | .908 | .987 | 1.337 | 2.114 |
| DN\_SD1 | .560 | .526 | .485 | .621 | .308 | 1.017 | .231 | .133 | .268 | .188 | .554 | .509 | .677 | .650 | .920 | .997 | .955 | 1.013 | .899 | 1.066 | .997 | .932 | .980 | .965 | 1.091 | .923 | 1.042 | 1.439 | 1.446 | 1.920 |

Condition number = 134.828

Eigenvalues

22.558 9.006 4.376 3.136 2.843 2.277 1.970 1.609 1.396 1.205 1.152 1.067 1.029 .925 .854 .791 .648 .590 .567 .504 .484 .445 .423 .359 .353 .332 .282 .216 .213 .167

Determinant of sample covariance matrix = .069

##### Sample Correlations (Group number 1)

|  | BEHAVIOR\_SD\_1 | BEHAVIOR\_SD\_2 | BEHAVIOR\_SD\_3 | BEHAVIOR\_SD\_5 | SE\_SD6R | IN\_SD4 | Susceptib1 | Susceptib2 | Susceptib3 | Susceptib4 | Severity1 | Severity2 | Severity3 | Severity4 | BI\_SD3 | BI\_SD2 | BI\_SD1 | IN\_SD3 | SE\_SD5 | SE\_SD4 | SE\_SD3 | SE\_SD2 | SE\_SD1 | RE\_SD4 | RE\_SD3 | RE\_SD2 | RE\_SD1 | DN\_SD3 | DN\_SD2 | DN\_SD1 |
| --- | --- | --- | --- | --- | --- | --- | --- | --- | --- | --- | --- | --- | --- | --- | --- | --- | --- | --- | --- | --- | --- | --- | --- | --- | --- | --- | --- | --- | --- | --- |
| BEHAVIOR\_SD\_1 | 1.000 |
| BEHAVIOR\_SD\_2 | .620 | 1.000 |
| BEHAVIOR\_SD\_3 | .573 | .641 | 1.000 |
| BEHAVIOR\_SD\_5 | .526 | .617 | .739 | 1.000 |
| SE\_SD6R | .134 | .190 | .251 | .205 | 1.000 |
| IN\_SD4 | .216 | .237 | .223 | .265 | .008 | 1.000 |
| Susceptib1 | .164 | .163 | .056 | .137 | -.094 | .106 | 1.000 |
| Susceptib2 | .073 | .152 | .083 | .133 | -.036 | .041 | .519 | 1.000 |
| Susceptib3 | .168 | .205 | .124 | .196 | .023 | .073 | .577 | .572 | 1.000 |
| Susceptib4 | .123 | .094 | .053 | .133 | -.064 | .102 | .636 | .489 | .662 | 1.000 |
| Severity1 | .273 | .238 | .280 | .261 | .063 | .176 | .400 | .223 | .302 | .252 | 1.000 |
| Severity2 | .257 | .283 | .352 | .344 | .130 | .243 | .165 | .133 | .169 | .123 | .437 | 1.000 |
| Severity3 | .301 | .369 | .398 | .345 | .090 | .191 | .261 | .271 | .273 | .152 | .347 | .561 | 1.000 |
| Severity4 | .283 | .286 | .254 | .292 | .018 | .234 | .536 | .298 | .378 | .390 | .666 | .409 | .379 | 1.000 |
| BI\_SD3 | .476 | .431 | .513 | .502 | .298 | .364 | .118 | .086 | .139 | .152 | .323 | .429 | .374 | .361 | 1.000 |
| BI\_SD2 | .470 | .397 | .527 | .518 | .261 | .408 | .134 | .031 | .108 | .152 | .332 | .432 | .385 | .374 | .801 | 1.000 |
| BI\_SD1 | .412 | .359 | .458 | .484 | .200 | .373 | .059 | -.010 | .034 | .120 | .277 | .402 | .350 | .324 | .774 | .763 | 1.000 |
| IN\_SD3 | .294 | .224 | .259 | .295 | .027 | .627 | .095 | .006 | .089 | .141 | .241 | .276 | .227 | .238 | .410 | .476 | .372 | 1.000 |
| SE\_SD5 | .493 | .468 | .500 | .435 | .234 | .334 | .116 | .117 | .106 | .095 | .310 | .470 | .554 | .338 | .606 | .569 | .593 | .291 | 1.000 |
| SE\_SD4 | .473 | .417 | .446 | .407 | .292 | .347 | .090 | .040 | .063 | .108 | .265 | .354 | .402 | .257 | .608 | .609 | .549 | .314 | .648 | 1.000 |
| SE\_SD3 | .403 | .284 | .381 | .412 | .240 | .267 | .071 | -.037 | .038 | .080 | .256 | .365 | .319 | .259 | .563 | .559 | .465 | .316 | .501 | .670 | 1.000 |
| SE\_SD2 | .445 | .431 | .509 | .512 | .234 | .310 | .141 | .090 | .102 | .122 | .315 | .425 | .484 | .340 | .633 | .679 | .608 | .347 | .708 | .693 | .630 | 1.000 |
| SE\_SD1 | .429 | .351 | .386 | .371 | .276 | .226 | .064 | -.045 | .015 | .070 | .278 | .325 | .344 | .239 | .565 | .567 | .518 | .244 | .559 | .765 | .712 | .643 | 1.000 |
| RE\_SD4 | .433 | .506 | .559 | .571 | .271 | .380 | .119 | .088 | .125 | .107 | .283 | .456 | .486 | .348 | .662 | .645 | .614 | .399 | .697 | .597 | .500 | .663 | .533 | 1.000 |
| RE\_SD3 | .438 | .480 | .492 | .529 | .238 | .397 | .085 | .084 | .113 | .076 | .285 | .463 | .431 | .327 | .723 | .678 | .715 | .424 | .615 | .607 | .504 | .657 | .519 | .754 | 1.000 |
| RE\_SD2 | .404 | .408 | .447 | .494 | .173 | .354 | .116 | .122 | .097 | .068 | .254 | .399 | .442 | .333 | .580 | .582 | .552 | .422 | .574 | .479 | .462 | .610 | .413 | .698 | .688 | 1.000 |
| RE\_SD1 | .382 | .428 | .456 | .451 | .177 | .365 | .116 | .112 | .172 | .105 | .289 | .411 | .477 | .326 | .581 | .561 | .597 | .359 | .652 | .563 | .487 | .659 | .473 | .711 | .752 | .657 | 1.000 |
| DN\_SD3 | .560 | .509 | .451 | .467 | .180 | .397 | .044 | .034 | .050 | .037 | .260 | .321 | .346 | .265 | .569 | .571 | .564 | .429 | .625 | .613 | .547 | .616 | .542 | .607 | .636 | .592 | .575 | 1.000 |
| DN\_SD2 | .445 | .415 | .357 | .402 | .094 | .408 | .049 | .029 | .087 | .047 | .243 | .297 | .348 | .229 | .433 | .469 | .445 | .420 | .489 | .450 | .452 | .493 | .416 | .484 | .533 | .474 | .512 | .680 | 1.000 |
| DN\_SD1 | .483 | .450 | .420 | .479 | .113 | .414 | .093 | .060 | .110 | .082 | .231 | .274 | .382 | .267 | .477 | .509 | .511 | .428 | .585 | .550 | .465 | .559 | .480 | .545 | .593 | .506 | .568 | .769 | .718 | 1.000 |

Condition number = 87.249

Eigenvalues

12.425 3.163 1.521 1.412 1.174 1.064 1.043 .800 .727 .587 .557 .488 .477 .434 .410 .377 .338 .312 .301 .290 .275 .265 .249 .239 .210 .199 .183 .178 .159 .142

##### Models

##### Default model (Default model)

##### Notes for Model (Default model)

##### Computation of degrees of freedom (Default model)

|  |  |
| --- | --- |
| Number of distinct sample moments: | 465 |
| Number of distinct parameters to be estimated: | 79 |
| Degrees of freedom (465 - 79): | 386 |

##### Result (Default model)

Minimum was achieved

Chi-square = 877.350

Degrees of freedom = 386

Probability level = .000

##### Group number 1 (Group number 1 - Default model)

##### Estimates (Group number 1 - Default model)

##### Scalar Estimates (Group number 1 - Default model)

##### Maximum Likelihood Estimates

##### Regression Weights: (Group number 1 - Default model)

|  |  |  | Estimate | S.E. | C.R. | P | Label |
| --- | --- | --- | --- | --- | --- | --- | --- |
| RES\_CLEAN | <--- | EFF\_CLEAN | .956 | .068 | 14.089 | \*\*\* |  |
| SEF\_CLEAN | <--- | EFF\_CLEAN | 1.000 |  |
| SEV | <--- | RI\_CLEAN | 1.000 |  |
| SUS | <--- | RI\_CLEAN | .278 | .086 | 3.224 | .001 |  |
| DN\_SD1 | <--- | DES\_CLEAN | 1.009 | .048 | 20.886 | \*\*\* |  |
| DN\_SD2 | <--- | DES\_CLEAN | .954 | .054 | 17.566 | \*\*\* |  |
| DN\_SD3 | <--- | DES\_CLEAN | 1.000 |  |
| RE\_SD1 | <--- | RES\_CLEAN | 1.000 |  |
| RE\_SD2 | <--- | RES\_CLEAN | .945 | .057 | 16.510 | \*\*\* |  |
| RE\_SD3 | <--- | RES\_CLEAN | 1.081 | .054 | 20.040 | \*\*\* |  |
| RE\_SD4 | <--- | RES\_CLEAN | 1.007 | .053 | 18.996 | \*\*\* |  |
| SE\_SD1 | <--- | SEF\_CLEAN | 1.000 |  |
| SE\_SD2 | <--- | SEF\_CLEAN | .866 | .049 | 17.545 | \*\*\* |  |
| SE\_SD3 | <--- | SEF\_CLEAN | .994 | .066 | 15.010 | \*\*\* |  |
| SE\_SD4 | <--- | SEF\_CLEAN | 1.010 | .057 | 17.612 | \*\*\* |  |
| SE\_SD5 | <--- | SEF\_CLEAN | .737 | .047 | 15.718 | \*\*\* |  |
| IN\_SD3 | <--- | INJ\_CLEAN | 1.000 |  |
| BI\_SD1 | <--- | INTENT\_CLEAN | 1.000 |  |
| BI\_SD2 | <--- | INTENT\_CLEAN | 1.097 | .051 | 21.368 | \*\*\* |  |
| BI\_SD3 | <--- | INTENT\_CLEAN | 1.089 | .050 | 21.643 | \*\*\* |  |
| Severity4 | <--- | SEV | 1.000 |  |
| Severity3 | <--- | SEV | .597 | .058 | 10.362 | \*\*\* |  |
| Severity2 | <--- | SEV | .646 | .061 | 10.647 | \*\*\* |  |
| Severity1 | <--- | SEV | .920 | .078 | 11.723 | \*\*\* |  |
| Susceptib4 | <--- | SUS | 1.000 |  |
| Susceptib3 | <--- | SUS | 1.065 | .074 | 14.303 | \*\*\* |  |
| Susceptib2 | <--- | SUS | .809 | .069 | 11.752 | \*\*\* |  |
| Susceptib1 | <--- | SUS | 1.064 | .076 | 13.982 | \*\*\* |  |
| IN\_SD4 | <--- | INJ\_CLEAN | .960 | .092 | 10.408 | \*\*\* |  |
| SE\_SD6R | <--- | SEF\_CLEAN | .522 | .095 | 5.526 | \*\*\* |  |
| BEHAVIOR\_SD\_5 | <--- | BE\_SD | 1.000 |  |
| BEHAVIOR\_SD\_3 | <--- | BE\_SD | .914 | .053 | 17.159 | \*\*\* |  |
| BEHAVIOR\_SD\_2 | <--- | BE\_SD | .842 | .055 | 15.240 | \*\*\* |  |
| BEHAVIOR\_SD\_1 | <--- | BE\_SD | .770 | .056 | 13.686 | \*\*\* |  |

##### Standardized Regression Weights: (Group number 1 - Default model)

|  |  |  | Estimate |
| --- | --- | --- | --- |
| RES\_CLEAN | <--- | EFF\_CLEAN | .924 |
| SEF\_CLEAN | <--- | EFF\_CLEAN | .897 |
| SEV | <--- | RI\_CLEAN | 1.394 |
| SUS | <--- | RI\_CLEAN | .392 |
| DN\_SD1 | <--- | DES\_CLEAN | .873 |
| DN\_SD2 | <--- | DES\_CLEAN | .786 |
| DN\_SD3 | <--- | DES\_CLEAN | .887 |
| RE\_SD1 | <--- | RES\_CLEAN | .827 |
| RE\_SD2 | <--- | RES\_CLEAN | .786 |
| RE\_SD3 | <--- | RES\_CLEAN | .892 |
| RE\_SD4 | <--- | RES\_CLEAN | .862 |
| SE\_SD1 | <--- | SEF\_CLEAN | .802 |
| SE\_SD2 | <--- | SEF\_CLEAN | .850 |
| SE\_SD3 | <--- | SEF\_CLEAN | .757 |
| SE\_SD4 | <--- | SEF\_CLEAN | .852 |
| SE\_SD5 | <--- | SEF\_CLEAN | .784 |
| IN\_SD3 | <--- | INJ\_CLEAN | .823 |
| BI\_SD1 | <--- | INTENT\_CLEAN | .855 |
| BI\_SD2 | <--- | INTENT\_CLEAN | .893 |
| BI\_SD3 | <--- | INTENT\_CLEAN | .900 |
| Severity4 | <--- | SEV | .760 |
| Severity3 | <--- | SEV | .625 |
| Severity2 | <--- | SEV | .643 |
| Severity1 | <--- | SEV | .710 |
| Susceptib4 | <--- | SUS | .794 |
| Susceptib3 | <--- | SUS | .800 |
| Susceptib2 | <--- | SUS | .664 |
| Susceptib1 | <--- | SUS | .781 |
| IN\_SD4 | <--- | INJ\_CLEAN | .762 |
| SE\_SD6R | <--- | SEF\_CLEAN | .312 |
| BEHAVIOR\_SD\_5 | <--- | BE\_SD | .825 |
| BEHAVIOR\_SD\_3 | <--- | BE\_SD | .848 |
| BEHAVIOR\_SD\_2 | <--- | BE\_SD | .771 |
| BEHAVIOR\_SD\_1 | <--- | BE\_SD | .710 |

##### Covariances: (Group number 1 - Default model)

|  |  |  | Estimate | S.E. | C.R. | P | Label |
| --- | --- | --- | --- | --- | --- | --- | --- |
| DES\_CLEAN | <--> | EFF\_CLEAN | 1.075 | .116 | 9.304 | \*\*\* |  |
| DES\_CLEAN | <--> | INTENT\_CLEAN | .936 | .106 | 8.811 | \*\*\* |  |
| EFF\_CLEAN | <--> | INTENT\_CLEAN | 1.113 | .117 | 9.517 | \*\*\* |  |
| EFF\_CLEAN | <--> | INJ\_CLEAN | .859 | .123 | 6.954 | \*\*\* |  |
| INJ\_CLEAN | <--> | INTENT\_CLEAN | .931 | .127 | 7.323 | \*\*\* |  |
| DES\_CLEAN | <--> | INJ\_CLEAN | 1.024 | .134 | 7.631 | \*\*\* |  |
| EFF\_CLEAN | <--> | RI\_CLEAN | .939 | .125 | 7.527 | \*\*\* |  |
| INTENT\_CLEAN | <--> | RI\_CLEAN | .904 | .123 | 7.380 | \*\*\* |  |
| INJ\_CLEAN | <--> | RI\_CLEAN | .770 | .146 | 5.273 | \*\*\* |  |
| DES\_CLEAN | <--> | RI\_CLEAN | .766 | .120 | 6.384 | \*\*\* |  |
| DES\_CLEAN | <--> | BE\_SD | .610 | .072 | 8.436 | \*\*\* |  |
| RI\_CLEAN | <--> | BE\_SD | .539 | .081 | 6.665 | \*\*\* |  |
| INJ\_CLEAN | <--> | BE\_SD | .432 | .080 | 5.387 | \*\*\* |  |
| EFF\_CLEAN | <--> | BE\_SD | .616 | .072 | 8.497 | \*\*\* |  |
| INTENT\_CLEAN | <--> | BE\_SD | .593 | .070 | 8.451 | \*\*\* |  |

##### Correlations: (Group number 1 - Default model)

|  |  |  | Estimate |
| --- | --- | --- | --- |
| DES\_CLEAN | <--> | EFF\_CLEAN | .847 |
| DES\_CLEAN | <--> | INTENT\_CLEAN | .678 |
| EFF\_CLEAN | <--> | INTENT\_CLEAN | .913 |
| EFF\_CLEAN | <--> | INJ\_CLEAN | .577 |
| INJ\_CLEAN | <--> | INTENT\_CLEAN | .576 |
| DES\_CLEAN | <--> | INJ\_CLEAN | .608 |
| EFF\_CLEAN | <--> | RI\_CLEAN | .476 |
| INTENT\_CLEAN | <--> | RI\_CLEAN | .422 |
| INJ\_CLEAN | <--> | RI\_CLEAN | .294 |
| DES\_CLEAN | <--> | RI\_CLEAN | .343 |
| DES\_CLEAN | <--> | BE\_SD | .659 |
| RI\_CLEAN | <--> | BE\_SD | .375 |
| INJ\_CLEAN | <--> | BE\_SD | .398 |
| EFF\_CLEAN | <--> | BE\_SD | .753 |
| INTENT\_CLEAN | <--> | BE\_SD | .667 |

##### Variances: (Group number 1 - Default model)

|  |  |  | Estimate | S.E. | C.R. | P | Label |
| --- | --- | --- | --- | --- | --- | --- | --- |
| DES\_CLEAN |  |  | 1.436 | .145 | 9.882 | \*\*\* |  |
| EFF\_CLEAN |  |  | 1.122 | .148 | 7.557 | \*\*\* |  |
| INJ\_CLEAN |  |  | 1.973 | .270 | 7.318 | \*\*\* |  |
| INTENT\_CLEAN |  |  | 1.326 | .141 | 9.427 | \*\*\* |  |
| RI\_CLEAN |  |  | 3.469 | .955 | 3.632 | \*\*\* |  |
| BE\_SD |  |  | .596 | .068 | 8.711 | \*\*\* |  |
| e14 |  |  | .174 | .035 | 4.931 | \*\*\* |  |
| e15 |  |  | .271 | .047 | 5.791 | \*\*\* |  |
| e40 |  |  | -1.684 | .909 | -1.853 | .064 |  |
| e41 |  |  | 1.469 | .198 | 7.403 | \*\*\* |  |
| e2 |  |  | .457 | .053 | 8.579 | \*\*\* |  |
| e3 |  |  | .806 | .075 | 10.689 | \*\*\* |  |
| e4 |  |  | .388 | .049 | 7.969 | \*\*\* |  |
| e5 |  |  | .554 | .052 | 10.740 | \*\*\* |  |
| e6 |  |  | .664 | .059 | 11.250 | \*\*\* |  |
| e7 |  |  | .361 | .040 | 9.121 | \*\*\* |  |
| e8 |  |  | .420 | .042 | 10.056 | \*\*\* |  |
| e9 |  |  | .775 | .071 | 10.929 | \*\*\* |  |
| e10 |  |  | .402 | .040 | 10.122 | \*\*\* |  |
| e11 |  |  | 1.026 | .090 | 11.387 | \*\*\* |  |
| e12 |  |  | .536 | .053 | 10.069 | \*\*\* |  |
| e13 |  |  | .475 | .043 | 11.135 | \*\*\* |  |
| e18 |  |  | .939 | .176 | 5.325 | \*\*\* |  |
| e19 |  |  | .490 | .048 | 10.124 | \*\*\* |  |
| e20 |  |  | .403 | .045 | 8.875 | \*\*\* |  |
| e21 |  |  | .368 | .043 | 8.571 | \*\*\* |  |
| e32 |  |  | 1.306 | .143 | 9.145 | \*\*\* |  |
| e33 |  |  | .993 | .090 | 11.064 | \*\*\* |  |
| e34 |  |  | 1.059 | .097 | 10.903 | \*\*\* |  |
| e35 |  |  | 1.485 | .148 | 10.069 | \*\*\* |  |
| e36 |  |  | 1.019 | .113 | 9.018 | \*\*\* |  |
| e37 |  |  | 1.108 | .125 | 8.858 | \*\*\* |  |
| e38 |  |  | 1.441 | .131 | 11.042 | \*\*\* |  |
| e39 |  |  | 1.260 | .135 | 9.337 | \*\*\* |  |
| e43 |  |  | 1.315 | .180 | 7.296 | \*\*\* |  |
| e44 |  |  | 3.512 | .279 | 12.603 | \*\*\* |  |
| e45 |  |  | .280 | .030 | 9.312 | \*\*\* |  |
| e46 |  |  | .195 | .023 | 8.651 | \*\*\* |  |
| e47 |  |  | .288 | .028 | 10.394 | \*\*\* |  |
| e48 |  |  | .348 | .031 | 11.126 | \*\*\* |  |

##### Matrices (Group number 1 - Default model)

##### Implied Covariances (Group number 1 - Default model)

|  | BEHAVIOR\_SD\_1 | BEHAVIOR\_SD\_2 | BEHAVIOR\_SD\_3 | BEHAVIOR\_SD\_5 | SE\_SD6R | IN\_SD4 | Susceptib1 | Susceptib2 | Susceptib3 | Susceptib4 | Severity1 | Severity2 | Severity3 | Severity4 | BI\_SD3 | BI\_SD2 | BI\_SD1 | IN\_SD3 | SE\_SD5 | SE\_SD4 | SE\_SD3 | SE\_SD2 | SE\_SD1 | RE\_SD4 | RE\_SD3 | RE\_SD2 | RE\_SD1 | DN\_SD3 | DN\_SD2 | DN\_SD1 |
| --- | --- | --- | --- | --- | --- | --- | --- | --- | --- | --- | --- | --- | --- | --- | --- | --- | --- | --- | --- | --- | --- | --- | --- | --- | --- | --- | --- | --- | --- | --- |
| BEHAVIOR\_SD\_1 | .701 |
| BEHAVIOR\_SD\_2 | .386 | .710 |
| BEHAVIOR\_SD\_3 | .420 | .459 | .694 |
| BEHAVIOR\_SD\_5 | .459 | .502 | .545 | .876 |
| SE\_SD6R | .248 | .271 | .294 | .322 | 3.892 |
| IN\_SD4 | .319 | .349 | .379 | .415 | .431 | 3.135 |
| Susceptib1 | .123 | .134 | .146 | .159 | .145 | .218 | 3.225 |
| Susceptib2 | .093 | .102 | .111 | .121 | .110 | .166 | 1.494 | 2.577 |
| Susceptib3 | .123 | .134 | .146 | .159 | .145 | .218 | 1.967 | 1.496 | 3.077 |
| Susceptib4 | .115 | .126 | .137 | .150 | .136 | .205 | 1.847 | 1.404 | 1.849 | 2.755 |
| Severity1 | .382 | .418 | .454 | .496 | .451 | .680 | .943 | .717 | .944 | .886 | 2.997 |
| Severity2 | .268 | .293 | .319 | .348 | .317 | .477 | .662 | .503 | .662 | .622 | 1.061 | 1.804 |
| Severity3 | .248 | .271 | .295 | .322 | .293 | .442 | .612 | .465 | .613 | .575 | .981 | .689 | 1.631 |
| Severity4 | .415 | .454 | .493 | .539 | .490 | .739 | 1.024 | .779 | 1.026 | .963 | 1.643 | 1.153 | 1.066 | 3.091 |
| BI\_SD3 | .497 | .543 | .590 | .645 | .633 | .973 | .291 | .221 | .291 | .273 | .906 | .636 | .588 | .985 | 1.939 |
| BI\_SD2 | .501 | .548 | .595 | .651 | .638 | .981 | .293 | .223 | .293 | .276 | .913 | .641 | .593 | .993 | 1.584 | 2.000 |
| BI\_SD1 | .456 | .499 | .542 | .593 | .582 | .894 | .267 | .203 | .267 | .251 | .832 | .584 | .540 | .904 | 1.443 | 1.455 | 1.816 |
| IN\_SD3 | .332 | .363 | .395 | .432 | .449 | 1.894 | .227 | .173 | .228 | .214 | .708 | .497 | .460 | .770 | 1.013 | 1.022 | .931 | 2.912 |
| SE\_SD5 | .349 | .382 | .415 | .454 | .536 | .608 | .204 | .155 | .205 | .192 | .637 | .447 | .414 | .692 | .893 | .901 | .821 | .633 | 1.232 |
| SE\_SD4 | .479 | .523 | .569 | .622 | .735 | .833 | .280 | .213 | .280 | .263 | .873 | .612 | .567 | .948 | 1.224 | 1.234 | 1.124 | .867 | 1.037 | 1.956 |
| SE\_SD3 | .471 | .515 | .559 | .612 | .723 | .819 | .276 | .210 | .276 | .259 | .859 | .603 | .557 | .933 | 1.204 | 1.214 | 1.106 | .853 | 1.020 | 1.397 | 2.401 |
| SE\_SD2 | .410 | .449 | .488 | .533 | .630 | .714 | .240 | .183 | .240 | .226 | .748 | .525 | .486 | .813 | 1.050 | 1.058 | .964 | .744 | .889 | 1.218 | 1.198 | 1.446 |
| SE\_SD1 | .474 | .518 | .563 | .616 | .727 | .825 | .277 | .211 | .278 | .261 | .864 | .607 | .561 | .939 | 1.212 | 1.222 | 1.113 | .859 | 1.027 | 1.406 | 1.384 | 1.206 | 2.168 |
| RE\_SD4 | .456 | .499 | .542 | .592 | .564 | .793 | .267 | .203 | .267 | .251 | .831 | .584 | .540 | .903 | 1.166 | 1.175 | 1.071 | .826 | .795 | 1.090 | 1.072 | .934 | 1.079 | 1.635 |
| RE\_SD3 | .490 | .536 | .582 | .636 | .605 | .852 | .287 | .218 | .287 | .269 | .893 | .627 | .580 | .970 | 1.253 | 1.263 | 1.151 | .887 | .854 | 1.170 | 1.152 | 1.004 | 1.159 | 1.305 | 1.762 |
| RE\_SD2 | .428 | .468 | .509 | .556 | .529 | .745 | .250 | .190 | .251 | .235 | .780 | .548 | .507 | .848 | 1.095 | 1.104 | 1.006 | .776 | .747 | 1.023 | 1.006 | .877 | 1.013 | 1.140 | 1.225 | 1.734 |
| RE\_SD1 | .453 | .495 | .538 | .589 | .560 | .788 | .265 | .202 | .265 | .249 | .826 | .580 | .536 | .897 | 1.158 | 1.168 | 1.064 | .821 | .790 | 1.082 | 1.065 | .928 | 1.072 | 1.207 | 1.296 | 1.133 | 1.753 |
| DN\_SD3 | .469 | .513 | .557 | .610 | .562 | .984 | .226 | .172 | .227 | .213 | .705 | .495 | .458 | .766 | 1.018 | 1.027 | .936 | 1.024 | .792 | 1.086 | 1.068 | .931 | 1.075 | 1.034 | 1.111 | .971 | 1.028 | 1.825 |
| DN\_SD2 | .448 | .489 | .532 | .582 | .536 | .939 | .216 | .164 | .216 | .203 | .673 | .472 | .437 | .731 | .972 | .980 | .893 | .977 | .756 | 1.036 | 1.019 | .888 | 1.026 | .987 | 1.060 | .927 | .980 | 1.371 | 2.114 |
| DN\_SD1 | .473 | .518 | .562 | .615 | .567 | .993 | .228 | .174 | .229 | .215 | .712 | .500 | .462 | .773 | 1.028 | 1.036 | .944 | 1.034 | .800 | 1.096 | 1.078 | .940 | 1.085 | 1.044 | 1.121 | .980 | 1.037 | 1.450 | 1.383 | 1.920 |

##### Implied Correlations (Group number 1 - Default model)

|  | BEHAVIOR\_SD\_1 | BEHAVIOR\_SD\_2 | BEHAVIOR\_SD\_3 | BEHAVIOR\_SD\_5 | SE\_SD6R | IN\_SD4 | Susceptib1 | Susceptib2 | Susceptib3 | Susceptib4 | Severity1 | Severity2 | Severity3 | Severity4 | BI\_SD3 | BI\_SD2 | BI\_SD1 | IN\_SD3 | SE\_SD5 | SE\_SD4 | SE\_SD3 | SE\_SD2 | SE\_SD1 | RE\_SD4 | RE\_SD3 | RE\_SD2 | RE\_SD1 | DN\_SD3 | DN\_SD2 | DN\_SD1 |
| --- | --- | --- | --- | --- | --- | --- | --- | --- | --- | --- | --- | --- | --- | --- | --- | --- | --- | --- | --- | --- | --- | --- | --- | --- | --- | --- | --- | --- | --- | --- |
| BEHAVIOR\_SD\_1 | 1.000 |
| BEHAVIOR\_SD\_2 | .547 | 1.000 |
| BEHAVIOR\_SD\_3 | .601 | .654 | 1.000 |
| BEHAVIOR\_SD\_5 | .585 | .636 | .699 | 1.000 |
| SE\_SD6R | .150 | .163 | .179 | .174 | 1.000 |
| IN\_SD4 | .215 | .234 | .257 | .250 | .123 | 1.000 |
| Susceptib1 | .082 | .089 | .097 | .095 | .041 | .069 | 1.000 |
| Susceptib2 | .069 | .075 | .083 | .081 | .035 | .058 | .518 | 1.000 |
| Susceptib3 | .084 | .091 | .100 | .097 | .042 | .070 | .624 | .531 | 1.000 |
| Susceptib4 | .083 | .090 | .099 | .096 | .042 | .070 | .620 | .527 | .635 | 1.000 |
| Severity1 | .263 | .286 | .315 | .306 | .132 | .222 | .303 | .258 | .311 | .308 | 1.000 |
| Severity2 | .238 | .259 | .285 | .277 | .120 | .201 | .274 | .233 | .281 | .279 | .456 | 1.000 |
| Severity3 | .232 | .252 | .277 | .270 | .116 | .195 | .267 | .227 | .274 | .271 | .444 | .402 | 1.000 |
| Severity4 | .282 | .306 | .337 | .328 | .141 | .237 | .324 | .276 | .333 | .330 | .540 | .488 | .475 | 1.000 |
| BI\_SD3 | .426 | .463 | .509 | .495 | .230 | .395 | .116 | .099 | .119 | .118 | .376 | .340 | .331 | .402 | 1.000 |
| BI\_SD2 | .423 | .459 | .505 | .491 | .229 | .392 | .115 | .098 | .118 | .117 | .373 | .338 | .328 | .399 | .804 | 1.000 |
| BI\_SD1 | .404 | .439 | .483 | .470 | .219 | .375 | .110 | .094 | .113 | .112 | .357 | .323 | .314 | .382 | .769 | .764 | 1.000 |
| IN\_SD3 | .233 | .253 | .278 | .270 | .133 | .627 | .074 | .063 | .076 | .075 | .240 | .217 | .211 | .257 | .427 | .423 | .405 | 1.000 |
| SE\_SD5 | .376 | .409 | .449 | .437 | .245 | .309 | .103 | .087 | .105 | .104 | .331 | .300 | .292 | .355 | .578 | .574 | .549 | .334 | 1.000 |
| SE\_SD4 | .409 | .444 | .488 | .475 | .266 | .336 | .111 | .095 | .114 | .113 | .360 | .326 | .317 | .386 | .628 | .624 | .597 | .363 | .668 | 1.000 |
| SE\_SD3 | .363 | .394 | .433 | .422 | .236 | .299 | .099 | .084 | .101 | .101 | .320 | .290 | .282 | .342 | .558 | .554 | .530 | .323 | .593 | .645 | 1.000 |
| SE\_SD2 | .408 | .443 | .487 | .474 | .265 | .335 | .111 | .095 | .114 | .113 | .359 | .325 | .316 | .385 | .627 | .622 | .595 | .362 | .666 | .724 | .643 | 1.000 |
| SE\_SD1 | .384 | .418 | .459 | .447 | .250 | .316 | .105 | .089 | .107 | .107 | .339 | .307 | .298 | .363 | .591 | .587 | .561 | .342 | .628 | .683 | .607 | .681 | 1.000 |
| RE\_SD4 | .426 | .463 | .509 | .495 | .223 | .350 | .116 | .099 | .119 | .118 | .376 | .340 | .331 | .402 | .655 | .650 | .622 | .379 | .560 | .609 | .541 | .608 | .573 | 1.000 |
| RE\_SD3 | .441 | .479 | .526 | .512 | .231 | .363 | .120 | .102 | .123 | .122 | .389 | .352 | .342 | .416 | .678 | .673 | .643 | .392 | .580 | .630 | .560 | .629 | .593 | .769 | 1.000 |
| RE\_SD2 | .388 | .422 | .464 | .451 | .204 | .319 | .106 | .090 | .109 | .108 | .342 | .310 | .301 | .366 | .597 | .592 | .567 | .345 | .511 | .555 | .493 | .554 | .522 | .677 | .701 | 1.000 |
| RE\_SD1 | .409 | .444 | .488 | .475 | .214 | .336 | .111 | .095 | .114 | .113 | .360 | .326 | .317 | .386 | .628 | .624 | .596 | .363 | .538 | .585 | .519 | .583 | .550 | .713 | .737 | .650 | 1.000 |
| DN\_SD3 | .415 | .451 | .495 | .482 | .211 | .411 | .093 | .079 | .096 | .095 | .302 | .273 | .265 | .323 | .541 | .537 | .514 | .444 | .529 | .575 | .510 | .573 | .541 | .599 | .620 | .546 | .575 | 1.000 |
| DN\_SD2 | .368 | .400 | .439 | .427 | .187 | .365 | .083 | .070 | .085 | .084 | .267 | .242 | .235 | .286 | .480 | .476 | .456 | .394 | .469 | .509 | .452 | .508 | .479 | .531 | .549 | .484 | .509 | .698 | 1.000 |
| DN\_SD1 | .408 | .443 | .487 | .474 | .207 | .405 | .092 | .078 | .094 | .093 | .297 | .268 | .261 | .317 | .533 | .529 | .506 | .437 | .520 | .565 | .502 | .564 | .532 | .589 | .610 | .537 | .565 | .775 | .687 | 1.000 |

##### Residual Covariances (Group number 1 - Default model)

|  | BEHAVIOR\_SD\_1 | BEHAVIOR\_SD\_2 | BEHAVIOR\_SD\_3 | BEHAVIOR\_SD\_5 | SE\_SD6R | IN\_SD4 | Susceptib1 | Susceptib2 | Susceptib3 | Susceptib4 | Severity1 | Severity2 | Severity3 | Severity4 | BI\_SD3 | BI\_SD2 | BI\_SD1 | IN\_SD3 | SE\_SD5 | SE\_SD4 | SE\_SD3 | SE\_SD2 | SE\_SD1 | RE\_SD4 | RE\_SD3 | RE\_SD2 | RE\_SD1 | DN\_SD3 | DN\_SD2 | DN\_SD1 |
| --- | --- | --- | --- | --- | --- | --- | --- | --- | --- | --- | --- | --- | --- | --- | --- | --- | --- | --- | --- | --- | --- | --- | --- | --- | --- | --- | --- | --- | --- | --- |
| BEHAVIOR\_SD\_1 | .000 |
| BEHAVIOR\_SD\_2 | .051 | .000 |
| BEHAVIOR\_SD\_3 | -.020 | -.009 | .000 |
| BEHAVIOR\_SD\_5 | -.046 | -.016 | .031 | .000 |
| SE\_SD6R | -.026 | .045 | .118 | .057 | .000 |
| IN\_SD4 | .002 | .005 | -.050 | .024 | -.402 | .000 |
| Susceptib1 | .123 | .112 | -.062 | .071 | -.477 | .120 | .000 |
| Susceptib2 | .005 | .104 | .001 | .078 | -.225 | -.048 | .001 | .000 |
| Susceptib3 | .124 | .168 | .035 | .163 | -.066 | .009 | -.150 | .114 | .000 |
| Susceptib4 | .055 | .006 | -.064 | .057 | -.347 | .093 | .050 | -.102 | .079 | .000 |
| Severity1 | .014 | -.071 | -.050 | -.074 | -.235 | -.140 | .300 | -.097 | -.027 | -.162 | .000 |
| Severity2 | .021 | .027 | .075 | .084 | .028 | .099 | -.263 | -.216 | -.265 | -.348 | -.046 | .000 |
| Severity3 | .074 | .126 | .129 | .090 | -.067 | -.009 | -.014 | .091 | -.002 | -.253 | -.213 | .273 | .000 |
| Severity4 | .002 | -.030 | -.122 | -.059 | -.426 | -.009 | .668 | .063 | .139 | .174 | .385 | -.187 | -.215 | .000 |
| BI\_SD3 | .059 | -.037 | .005 | .009 | .186 | -.075 | .005 | -.029 | .048 | .078 | -.128 | .167 | .077 | -.102 | .000 |
| BI\_SD2 | .056 | -.074 | .026 | .036 | .090 | .042 | .046 | -.152 | -.025 | .082 | -.100 | .180 | .102 | -.062 | -.006 | .000 |
| BI\_SD1 | .009 | -.091 | -.028 | .017 | -.050 | -.003 | -.125 | -.224 | -.186 | .017 | -.185 | .143 | .062 | -.138 | .008 | .000 | .000 |
| IN\_SD3 | .087 | -.041 | -.026 | .039 | -.359 | .000 | .062 | -.157 | .038 | .186 | .003 | .135 | .034 | -.056 | -.038 | .127 | -.075 | .000 |
| SE\_SD5 | .109 | .056 | .048 | -.002 | -.023 | .048 | .027 | .053 | .002 | -.018 | -.041 | .254 | .371 | -.033 | .043 | -.008 | .066 | -.081 | .000 |
| SE\_SD4 | .076 | -.032 | -.049 | -.089 | .070 | .026 | -.053 | -.124 | -.125 | -.012 | -.232 | .052 | .152 | -.316 | -.040 | -.028 | -.089 | -.118 | -.030 | .000 |
| SE\_SD3 | .052 | -.144 | -.067 | -.014 | .012 | -.086 | -.078 | -.302 | -.172 | -.054 | -.173 | .157 | .074 | -.228 | .010 | .012 | -.136 | -.017 | -.158 | .055 | .000 |
| SE\_SD2 | .038 | -.012 | .022 | .043 | -.075 | -.054 | .064 | -.010 | -.026 | .018 | -.093 | .161 | .258 | -.094 | .011 | .096 | .021 | -.032 | .056 | -.052 | -.025 | .000 |
| SE\_SD1 | .055 | -.083 | -.090 | -.104 | .075 | -.236 | -.107 | -.317 | -.238 | -.090 | -.156 | .037 | .085 | -.320 | -.054 | -.042 | -.086 | -.247 | -.113 | .169 | .241 | -.068 | .000 |
| RE\_SD4 | .007 | .046 | .054 | .091 | .121 | .067 | .007 | -.023 | .014 | -.024 | -.204 | .199 | .253 | -.122 | .013 | -.010 | -.014 | .044 | .194 | -.021 | -.082 | .085 | -.076 | .000 |
| RE\_SD3 | -.003 | .001 | -.038 | .021 | .018 | .081 | -.084 | -.038 | -.025 | -.102 | -.238 | .199 | .150 | -.206 | .083 | .010 | .129 | .073 | .052 | -.043 | -.115 | .045 | -.145 | -.025 | .000 |
| RE\_SD2 | .017 | -.016 | -.018 | .053 | -.079 | .080 | .024 | .067 | -.028 | -.087 | -.201 | .158 | .237 | -.078 | -.031 | -.020 | -.026 | .172 | .093 | -.140 | -.064 | .088 | -.213 | .035 | -.021 | .000 |
| RE\_SD1 | -.030 | -.018 | -.035 | -.029 | -.097 | .067 | .010 | .037 | .133 | -.019 | -.164 | .151 | .271 | -.139 | -.086 | -.117 | .001 | -.009 | .168 | -.041 | -.066 | .121 | -.150 | -.003 | .025 | .012 | .000 |
| DN\_SD3 | .165 | .066 | -.049 | -.019 | -.082 | -.035 | -.118 | -.099 | -.109 | -.130 | -.097 | .088 | .139 | -.138 | .052 | .064 | .092 | -.036 | .144 | .073 | .077 | .070 | .004 | .014 | .030 | .083 | .001 | .000 |
| DN\_SD2 | .095 | .018 | -.099 | -.035 | -.267 | .111 | -.089 | -.096 | .006 | -.090 | -.062 | .108 | .209 | -.145 | -.096 | -.015 | -.021 | .064 | .034 | -.121 | -.001 | -.025 | -.135 | -.086 | -.031 | -.018 | .006 | -.034 | .000 |
| DN\_SD1 | .087 | .008 | -.077 | .006 | -.259 | .024 | .003 | -.041 | .040 | -.027 | -.158 | .010 | .215 | -.123 | -.107 | -.039 | .011 | -.021 | .099 | -.029 | -.081 | -.008 | -.106 | -.079 | -.031 | -.057 | .005 | -.011 | .063 | .000 |

##### Standardized Residual Covariances (Group number 1 - Default model)

|  | BEHAVIOR\_SD\_1 | BEHAVIOR\_SD\_2 | BEHAVIOR\_SD\_3 | BEHAVIOR\_SD\_5 | SE\_SD6R | IN\_SD4 | Susceptib1 | Susceptib2 | Susceptib3 | Susceptib4 | Severity1 | Severity2 | Severity3 | Severity4 | BI\_SD3 | BI\_SD2 | BI\_SD1 | IN\_SD3 | SE\_SD5 | SE\_SD4 | SE\_SD3 | SE\_SD2 | SE\_SD1 | RE\_SD4 | RE\_SD3 | RE\_SD2 | RE\_SD1 | DN\_SD3 | DN\_SD2 | DN\_SD1 |
| --- | --- | --- | --- | --- | --- | --- | --- | --- | --- | --- | --- | --- | --- | --- | --- | --- | --- | --- | --- | --- | --- | --- | --- | --- | --- | --- | --- | --- | --- | --- |
| BEHAVIOR\_SD\_1 | .000 |
| BEHAVIOR\_SD\_2 | 1.149 | .000 |
| BEHAVIOR\_SD\_3 | -.433 | -.194 | .000 |
| BEHAVIOR\_SD\_5 | -.919 | -.299 | .592 | .000 |
| SE\_SD6R | -.282 | .477 | 1.267 | .550 | .000 |
| IN\_SD4 | .019 | .058 | -.588 | .256 | -2.054 | .000 |
| Susceptib1 | 1.470 | 1.331 | -.741 | .755 | -2.415 | .678 | .000 |
| Susceptib2 | .063 | 1.377 | .008 | .935 | -1.274 | -.303 | .007 | .000 |
| Susceptib3 | 1.517 | 2.037 | .431 | 1.774 | -.340 | .053 | -.726 | .642 | .000 |
| Susceptib4 | .711 | .071 | -.829 | .661 | -1.901 | .568 | .254 | -.609 | .413 | .000 |
| Severity1 | .167 | -.837 | -.592 | -.784 | -1.227 | -.800 | 1.662 | -.609 | -.154 | -.970 | .000 |
| Severity2 | .324 | .422 | 1.156 | 1.160 | .190 | .737 | -1.888 | -1.755 | -1.946 | -2.702 | -.323 | .000 |
| Severity3 | 1.214 | 2.036 | 2.098 | 1.312 | -.477 | -.073 | -.109 | .774 | -.013 | -2.071 | -1.585 | 2.656 | .000 |
| Severity4 | .021 | -.350 | -1.417 | -.608 | -2.188 | -.053 | 3.616 | .387 | .768 | 1.017 | 2.001 | -1.276 | -1.552 | .000 |
| BI\_SD3 | .836 | -.514 | .064 | .106 | 1.187 | -.510 | .038 | -.235 | .348 | .599 | -.890 | 1.520 | .737 | -.692 | .000 |
| BI\_SD2 | .788 | -1.014 | .355 | .434 | .563 | .279 | .324 | -1.195 | -.181 | .625 | -.688 | 1.611 | .966 | -.414 | -.043 | .000 |
| BI\_SD1 | .127 | -1.316 | -.407 | .222 | -.327 | -.022 | -.923 | -1.854 | -1.405 | .134 | -1.345 | 1.352 | .618 | -.977 | .063 | -.001 | .000 |
| IN\_SD3 | 1.069 | -.502 | -.323 | .426 | -1.898 | .000 | .364 | -1.029 | .225 | 1.174 | .019 | 1.038 | .275 | -.325 | -.266 | .872 | -.544 | .000 |
| SE\_SD5 | 1.965 | .988 | .843 | -.028 | -.185 | .418 | .245 | .537 | .017 | -.170 | -.363 | 2.933 | 4.521 | -.286 | .436 | -.075 | .698 | -.732 | .000 |
| SE\_SD4 | 1.078 | -.453 | -.675 | -1.102 | .442 | .178 | -.378 | -.989 | -.913 | -.095 | -1.619 | .475 | 1.454 | -2.155 | -.313 | -.219 | -.727 | -.838 | -.293 | .000 |
| SE\_SD3 | .682 | -1.849 | -.858 | -.166 | .070 | -.541 | -.501 | -2.174 | -1.128 | -.379 | -1.102 | 1.305 | .651 | -1.422 | .074 | .084 | -1.032 | -.113 | -1.424 | .383 | .000 |
| SE\_SD2 | .629 | -.199 | .361 | .615 | -.547 | -.430 | .532 | -.091 | -.222 | .159 | -.752 | 1.701 | 2.873 | -.745 | .100 | .864 | .204 | -.266 | .625 | -.450 | -.203 | .000 |
| SE\_SD1 | .750 | -1.114 | -1.202 | -1.242 | .451 | -1.554 | -.724 | -2.399 | -1.648 | -.656 | -1.044 | .318 | .778 | -2.091 | -.408 | -.310 | -.679 | -1.670 | -1.054 | 1.219 | 1.621 | -.570 | .000 |
| RE\_SD4 | .111 | .698 | .811 | 1.230 | .841 | .504 | .056 | -.198 | .114 | -.201 | -1.552 | 1.973 | 2.648 | -.905 | .111 | -.081 | -.123 | .339 | 2.139 | -.183 | -.653 | .849 | -.627 | .000 |
| RE\_SD3 | -.038 | .021 | -.540 | .270 | .119 | .584 | -.631 | -.322 | -.190 | -.824 | -1.732 | 1.895 | 1.508 | -1.467 | .668 | .079 | 1.090 | .540 | .549 | -.354 | -.877 | .430 | -1.144 | -.209 | .000 |
| RE\_SD2 | .263 | -.233 | -.269 | .705 | -.533 | .590 | .184 | .571 | -.213 | -.712 | -1.500 | 1.535 | 2.422 | -.565 | -.262 | -.165 | -.226 | 1.304 | 1.015 | -1.196 | -.502 | .878 | -1.746 | .309 | -.180 | .000 |
| RE\_SD1 | -.446 | -.259 | -.516 | -.384 | -.653 | .489 | .073 | .311 | 1.025 | -.155 | -1.212 | 1.454 | 2.742 | -.999 | -.714 | -.951 | .012 | -.065 | 1.811 | -.342 | -.512 | 1.179 | -1.213 | -.029 | .203 | .106 | .000 |
| DN\_SD3 | 2.415 | .951 | -.707 | -.246 | -.541 | -.245 | -.873 | -.818 | -.824 | -1.039 | -.717 | .841 | 1.398 | -.991 | .436 | .529 | .805 | -.258 | 1.526 | .605 | .586 | .676 | .029 | .128 | .254 | .736 | .009 | .000 |
| DN\_SD2 | 1.313 | .250 | -1.350 | -.424 | -1.647 | .726 | -.609 | -.734 | .044 | -.671 | -.426 | .969 | 1.966 | -.977 | -.767 | -.119 | -.177 | .433 | .339 | -.953 | -.010 | -.234 | -1.021 | -.737 | -.249 | -.154 | .051 | -.255 | .000 |
| DN\_SD1 | 1.243 | .115 | -1.083 | .077 | -1.666 | .162 | .020 | -.329 | .292 | -.208 | -1.133 | .089 | 2.109 | -.868 | -.883 | -.316 | .092 | -.146 | 1.030 | -.236 | -.605 | -.072 | -.821 | -.689 | -.258 | -.494 | .040 | -.080 | .460 | .000 |

##### Notes for Group/Model (Group number 1 - Default model)

##### The following variances are negative. (Group number 1 - Default model)

|  | e40 |
| --- | --- |
|  | -1.684 |

This solution is not admissible.

##### Modification Indices (Group number 1 - Default model)

##### Covariances: (Group number 1 - Default model)

|  |  |  | M.I. | Par Change |
| --- | --- | --- | --- | --- |
| e15 | <--> | INJ\_CLEAN | 5.174 | -.117 |
| e14 | <--> | INJ\_CLEAN | 4.232 | .091 |
| e48 | <--> | BE\_SD | 4.160 | -.042 |
| e48 | <--> | DES\_CLEAN | 16.202 | .112 |
| e48 | <--> | e14 | 11.606 | -.072 |
| e47 | <--> | INTENT\_CLEAN | 6.852 | -.058 |
| e47 | <--> | e48 | 11.102 | .067 |
| e46 | <--> | DES\_CLEAN | 11.112 | -.077 |
| e46 | <--> | e41 | 4.562 | -.078 |
| e45 | <--> | e48 | 10.051 | -.065 |
| e45 | <--> | e46 | 9.314 | .050 |
| e44 | <--> | e46 | 4.123 | .110 |
| e39 | <--> | RI\_CLEAN | 15.529 | .337 |
| e39 | <--> | e41 | 4.430 | -.182 |
| e39 | <--> | e40 | 17.108 | .324 |
| e39 | <--> | e46 | 4.041 | -.074 |
| e39 | <--> | e44 | 4.820 | -.292 |
| e37 | <--> | BE\_SD | 6.237 | .101 |
| e37 | <--> | e44 | 5.119 | .288 |
| e37 | <--> | e39 | 8.098 | -.234 |
| e36 | <--> | RI\_CLEAN | 8.499 | -.227 |
| e36 | <--> | INTENT\_CLEAN | 6.828 | .114 |
| e36 | <--> | e40 | 9.296 | -.217 |
| e35 | <--> | RI\_CLEAN | 5.705 | .204 |
| e35 | <--> | EFF\_CLEAN | 7.086 | -.105 |
| e35 | <--> | e40 | 5.532 | .184 |
| e35 | <--> | e14 | 8.760 | -.133 |
| e35 | <--> | e39 | 5.427 | .220 |
| e34 | <--> | EFF\_CLEAN | 5.642 | .077 |
| e34 | <--> | e41 | 13.323 | -.279 |
| e34 | <--> | e14 | 4.068 | .074 |
| e34 | <--> | e39 | 4.573 | -.165 |
| e33 | <--> | RI\_CLEAN | 8.481 | -.200 |
| e33 | <--> | INTENT\_CLEAN | 6.766 | -.103 |
| e33 | <--> | EFF\_CLEAN | 18.566 | .135 |
| e33 | <--> | e40 | 7.110 | -.168 |
| e33 | <--> | e15 | 7.066 | .109 |
| e33 | <--> | e14 | 7.309 | .096 |
| e33 | <--> | e38 | 7.602 | .206 |
| e33 | <--> | e36 | 8.425 | -.197 |
| e33 | <--> | e35 | 13.071 | -.280 |
| e33 | <--> | e34 | 28.525 | .340 |
| e32 | <--> | EFF\_CLEAN | 5.978 | -.094 |
| e32 | <--> | e41 | 11.633 | .307 |
| e32 | <--> | e15 | 4.110 | -.102 |
| e32 | <--> | e39 | 24.604 | .454 |
| e32 | <--> | e35 | 36.165 | .564 |
| e32 | <--> | e34 | 11.431 | -.262 |
| e32 | <--> | e33 | 16.014 | -.300 |
| e21 | <--> | e44 | 5.492 | .176 |
| e20 | <--> | INJ\_CLEAN | 4.931 | .121 |
| e20 | <--> | e14 | 5.052 | -.056 |
| e20 | <--> | e47 | 4.123 | -.049 |
| e19 | <--> | e37 | 4.126 | -.106 |
| e19 | <--> | e36 | 4.569 | .106 |
| e18 | <--> | e15 | 4.118 | -.099 |
| e18 | <--> | e20 | 6.120 | .128 |
| e18 | <--> | e19 | 4.508 | -.115 |
| e13 | <--> | RI\_CLEAN | 8.336 | .143 |
| e13 | <--> | e40 | 7.734 | .126 |
| e13 | <--> | e15 | 20.556 | -.126 |
| e13 | <--> | e14 | 11.221 | .082 |
| e13 | <--> | e45 | 6.088 | -.061 |
| e13 | <--> | e38 | 4.426 | .109 |
| e13 | <--> | e34 | 4.227 | .092 |
| e13 | <--> | e33 | 20.271 | .193 |
| e13 | <--> | e20 | 8.355 | -.087 |
| e13 | <--> | e18 | 4.491 | -.109 |
| e12 | <--> | RI\_CLEAN | 4.068 | -.111 |
| e12 | <--> | e40 | 4.066 | -.102 |
| e12 | <--> | e15 | 5.013 | .068 |
| e12 | <--> | e45 | 5.929 | -.066 |
| e12 | <--> | e43 | 4.149 | .123 |
| e11 | <--> | e14 | 4.639 | -.077 |
| e11 | <--> | e47 | 9.912 | -.109 |
| e11 | <--> | e38 | 5.405 | -.175 |
| e11 | <--> | e19 | 6.457 | -.117 |
| e11 | <--> | e13 | 20.440 | -.195 |
| e10 | <--> | e15 | 8.007 | -.074 |
| e10 | <--> | e14 | 7.911 | .066 |
| e10 | <--> | e48 | 4.605 | -.052 |
| e10 | <--> | e20 | 5.681 | .069 |
| e10 | <--> | e13 | 7.076 | .075 |
| e10 | <--> | e12 | 5.825 | -.075 |
| e9 | <--> | INJ\_CLEAN | 5.069 | -.156 |
| e9 | <--> | e15 | 12.847 | .128 |
| e9 | <--> | e14 | 11.078 | -.105 |
| e9 | <--> | e38 | 5.926 | -.162 |
| e9 | <--> | e13 | 14.243 | -.144 |
| e9 | <--> | e12 | 30.395 | .231 |
| e9 | <--> | e11 | 29.377 | .300 |
| e9 | <--> | e10 | 6.522 | -.093 |
| e8 | <--> | BE\_SD | 8.528 | .070 |
| e8 | <--> | DES\_CLEAN | 5.410 | -.074 |
| e8 | <--> | e48 | 5.260 | -.057 |
| e8 | <--> | e46 | 4.628 | .045 |
| e8 | <--> | e19 | 4.098 | -.063 |
| e8 | <--> | e13 | 12.762 | .105 |
| e7 | <--> | INTENT\_CLEAN | 14.077 | .097 |
| e7 | <--> | EFF\_CLEAN | 5.486 | -.047 |
| e7 | <--> | e15 | 4.453 | -.057 |
| e7 | <--> | e21 | 4.732 | .060 |
| e7 | <--> | e19 | 10.652 | .098 |
| e7 | <--> | e13 | 4.925 | -.063 |
| e6 | <--> | e18 | 4.866 | .133 |
| e6 | <--> | e12 | 6.240 | -.097 |
| e6 | <--> | e10 | 5.067 | .076 |
| e6 | <--> | e9 | 5.683 | -.108 |
| e5 | <--> | INTENT\_CLEAN | 8.227 | -.086 |
| e5 | <--> | EFF\_CLEAN | 5.749 | .056 |
| e5 | <--> | e37 | 4.352 | .113 |
| e5 | <--> | e33 | 4.135 | .096 |
| e5 | <--> | e20 | 4.545 | -.071 |
| e5 | <--> | e13 | 6.427 | .083 |
| e5 | <--> | e10 | 5.382 | .073 |
| e4 | <--> | e15 | 4.856 | .064 |
| e4 | <--> | e48 | 10.773 | .086 |
| e4 | <--> | e45 | 6.174 | -.063 |
| e2 | <--> | e34 | 4.465 | -.102 |
| e2 | <--> | e3 | 5.198 | .095 |

##### Variances: (Group number 1 - Default model)

|  |  |  | M.I. | Par Change |
| --- | --- | --- | --- | --- |

##### Regression Weights: (Group number 1 - Default model)

|  |  |  | M.I. | Par Change |
| --- | --- | --- | --- | --- |
| BEHAVIOR\_SD\_1 | <--- | DES\_CLEAN | 7.344 | .082 |
| BEHAVIOR\_SD\_1 | <--- | SE\_SD5 | 4.214 | .064 |
| BEHAVIOR\_SD\_1 | <--- | SE\_SD4 | 5.544 | .059 |
| BEHAVIOR\_SD\_1 | <--- | SE\_SD1 | 5.353 | .055 |
| BEHAVIOR\_SD\_1 | <--- | DN\_SD3 | 12.588 | .091 |
| BEHAVIOR\_SD\_1 | <--- | DN\_SD2 | 6.348 | .060 |
| BEHAVIOR\_SD\_1 | <--- | DN\_SD1 | 4.923 | .056 |
| BEHAVIOR\_SD\_2 | <--- | BEHAVIOR\_SD\_1 | 5.024 | .087 |
| BEHAVIOR\_SD\_2 | <--- | BI\_SD2 | 4.502 | -.049 |
| BEHAVIOR\_SD\_2 | <--- | BI\_SD1 | 4.149 | -.049 |
| BEHAVIOR\_SD\_2 | <--- | SE\_SD3 | 6.182 | -.052 |
| BEHAVIOR\_SD\_3 | <--- | DES\_CLEAN | 5.299 | -.058 |
| BEHAVIOR\_SD\_3 | <--- | Susceptib1 | 6.263 | -.040 |
| BEHAVIOR\_SD\_3 | <--- | DN\_SD3 | 5.843 | -.052 |
| BEHAVIOR\_SD\_3 | <--- | DN\_SD2 | 6.392 | -.050 |
| BEHAVIOR\_SD\_3 | <--- | DN\_SD1 | 5.343 | -.048 |
| BEHAVIOR\_SD\_5 | <--- | BEHAVIOR\_SD\_1 | 4.607 | -.086 |
| SE\_SD6R | <--- | INJ\_CLEAN | 4.019 | -.166 |
| SE\_SD6R | <--- | IN\_SD4 | 4.303 | -.123 |
| SE\_SD6R | <--- | Susceptib1 | 6.241 | -.146 |
| Susceptib1 | <--- | RI\_CLEAN | 14.069 | .109 |
| Susceptib1 | <--- | SEV | 5.230 | .132 |
| Susceptib1 | <--- | Severity1 | 8.895 | .122 |
| Susceptib1 | <--- | Severity4 | 19.627 | .178 |
| Susceptib2 | <--- | SE\_SD3 | 4.595 | -.098 |
| Susceptib2 | <--- | SE\_SD1 | 4.405 | -.101 |
| Susceptib4 | <--- | RI\_CLEAN | 7.339 | -.072 |
| Susceptib4 | <--- | Severity1 | 4.324 | -.077 |
| Susceptib4 | <--- | Severity3 | 9.258 | -.153 |
| Severity1 | <--- | RES\_CLEAN | 6.647 | -.181 |
| Severity1 | <--- | Severity3 | 7.290 | -.157 |
| Severity1 | <--- | Severity4 | 12.533 | .150 |
| Severity1 | <--- | SE\_SD5 | 4.278 | -.139 |
| Severity1 | <--- | RE\_SD4 | 8.255 | -.167 |
| Severity1 | <--- | RE\_SD3 | 6.252 | -.140 |
| Severity1 | <--- | RE\_SD2 | 6.891 | -.148 |
| Severity1 | <--- | RE\_SD1 | 4.834 | -.123 |
| Severity2 | <--- | INTENT\_CLEAN | 6.628 | .141 |
| Severity2 | <--- | EFF\_CLEAN | 5.726 | .142 |
| Severity2 | <--- | SUS | 12.551 | -.177 |
| Severity2 | <--- | SEF\_CLEAN | 6.063 | .132 |
| Severity2 | <--- | RES\_CLEAN | 7.666 | .159 |
| Severity2 | <--- | Susceptib1 | 14.051 | -.127 |
| Severity2 | <--- | Susceptib2 | 4.920 | -.084 |
| Severity2 | <--- | Susceptib3 | 7.224 | -.093 |
| Severity2 | <--- | Susceptib4 | 10.322 | -.118 |
| Severity2 | <--- | Severity3 | 15.781 | .189 |
| Severity2 | <--- | BI\_SD3 | 4.843 | .096 |
| Severity2 | <--- | BI\_SD2 | 4.796 | .094 |
| Severity2 | <--- | BI\_SD1 | 5.795 | .109 |
| Severity2 | <--- | SE\_SD5 | 9.378 | .168 |
| Severity2 | <--- | SE\_SD3 | 6.122 | .097 |
| Severity2 | <--- | SE\_SD2 | 4.042 | .102 |
| Severity2 | <--- | RE\_SD4 | 7.059 | .127 |
| Severity2 | <--- | RE\_SD3 | 9.636 | .142 |
| Severity2 | <--- | RE\_SD2 | 4.426 | .097 |
| Severity3 | <--- | BE\_SD | 7.672 | .223 |
| Severity3 | <--- | EFF\_CLEAN | 8.038 | .162 |
| Severity3 | <--- | DES\_CLEAN | 9.906 | .161 |
| Severity3 | <--- | SEF\_CLEAN | 12.017 | .179 |
| Severity3 | <--- | RES\_CLEAN | 11.328 | .186 |
| Severity3 | <--- | BEHAVIOR\_SD\_2 | 6.953 | .184 |
| Severity3 | <--- | BEHAVIOR\_SD\_3 | 9.071 | .212 |
| Severity3 | <--- | Susceptib4 | 5.112 | -.080 |
| Severity3 | <--- | Severity1 | 5.520 | -.080 |
| Severity3 | <--- | Severity2 | 15.036 | .169 |
| Severity3 | <--- | Severity4 | 5.423 | -.078 |
| Severity3 | <--- | SE\_SD5 | 27.582 | .277 |
| Severity3 | <--- | SE\_SD4 | 8.262 | .121 |
| Severity3 | <--- | SE\_SD2 | 13.215 | .177 |
| Severity3 | <--- | SE\_SD1 | 4.416 | .084 |
| Severity3 | <--- | RE\_SD4 | 12.642 | .163 |
| Severity3 | <--- | RE\_SD3 | 6.050 | .109 |
| Severity3 | <--- | RE\_SD2 | 10.934 | .147 |
| Severity3 | <--- | RE\_SD1 | 14.066 | .166 |
| Severity3 | <--- | DN\_SD3 | 4.260 | .090 |
| Severity3 | <--- | DN\_SD2 | 7.819 | .113 |
| Severity3 | <--- | DN\_SD1 | 10.068 | .134 |
| Severity4 | <--- | BE\_SD | 4.071 | -.200 |
| Severity4 | <--- | EFF\_CLEAN | 4.497 | -.149 |
| Severity4 | <--- | SUS | 10.649 | .193 |
| Severity4 | <--- | SEF\_CLEAN | 6.798 | -.166 |
| Severity4 | <--- | RES\_CLEAN | 5.102 | -.154 |
| Severity4 | <--- | BEHAVIOR\_SD\_3 | 6.323 | -.218 |
| Severity4 | <--- | SE\_SD6R | 4.972 | -.082 |
| Severity4 | <--- | Susceptib1 | 26.108 | .206 |
| Severity4 | <--- | Susceptib4 | 8.331 | .126 |
| Severity4 | <--- | Severity1 | 15.791 | .166 |
| Severity4 | <--- | Severity2 | 6.160 | -.134 |
| Severity4 | <--- | Severity3 | 9.024 | -.170 |
| Severity4 | <--- | SE\_SD5 | 5.292 | -.150 |
| Severity4 | <--- | SE\_SD4 | 7.678 | -.143 |
| Severity4 | <--- | SE\_SD2 | 4.394 | -.126 |
| Severity4 | <--- | SE\_SD1 | 5.371 | -.114 |
| Severity4 | <--- | RE\_SD4 | 4.220 | -.116 |
| Severity4 | <--- | RE\_SD3 | 5.318 | -.126 |
| Severity4 | <--- | RE\_SD1 | 4.424 | -.115 |
| BI\_SD3 | <--- | SE\_SD6R | 4.986 | .045 |
| BI\_SD2 | <--- | IN\_SD3 | 5.480 | .057 |
| BI\_SD1 | <--- | SUS | 4.082 | -.071 |
| BI\_SD1 | <--- | Susceptib2 | 5.106 | -.061 |
| BI\_SD1 | <--- | Susceptib3 | 6.533 | -.063 |
| SE\_SD5 | <--- | BE\_SD | 4.069 | .113 |
| SE\_SD5 | <--- | RI\_CLEAN | 9.964 | .053 |
| SE\_SD5 | <--- | DES\_CLEAN | 4.301 | .074 |
| SE\_SD5 | <--- | SEV | 7.890 | .094 |
| SE\_SD5 | <--- | RES\_CLEAN | 6.444 | .098 |
| SE\_SD5 | <--- | BEHAVIOR\_SD\_1 | 4.302 | .101 |
| SE\_SD5 | <--- | BEHAVIOR\_SD\_2 | 6.133 | .120 |
| SE\_SD5 | <--- | BEHAVIOR\_SD\_3 | 4.060 | .099 |
| SE\_SD5 | <--- | Susceptib2 | 5.074 | .057 |
| SE\_SD5 | <--- | Severity2 | 9.800 | .095 |
| SE\_SD5 | <--- | Severity3 | 24.283 | .157 |
| SE\_SD5 | <--- | SE\_SD3 | 8.008 | -.074 |
| SE\_SD5 | <--- | SE\_SD1 | 4.524 | -.059 |
| SE\_SD5 | <--- | RE\_SD4 | 14.040 | .119 |
| SE\_SD5 | <--- | RE\_SD2 | 5.667 | .074 |
| SE\_SD5 | <--- | RE\_SD1 | 11.228 | .103 |
| SE\_SD5 | <--- | DN\_SD1 | 5.537 | .069 |
| SE\_SD4 | <--- | RI\_CLEAN | 4.674 | -.040 |
| SE\_SD4 | <--- | BEHAVIOR\_SD\_5 | 4.187 | -.099 |
| SE\_SD4 | <--- | Severity4 | 4.016 | -.052 |
| SE\_SD4 | <--- | SE\_SD1 | 9.800 | .096 |
| SE\_SD4 | <--- | RE\_SD2 | 5.371 | -.080 |
| SE\_SD3 | <--- | BEHAVIOR\_SD\_2 | 6.778 | -.183 |
| SE\_SD3 | <--- | Susceptib2 | 5.286 | -.085 |
| SE\_SD3 | <--- | SE\_SD5 | 7.088 | -.142 |
| SE\_SD3 | <--- | SE\_SD1 | 9.302 | .123 |
| SE\_SD2 | <--- | Severity3 | 4.708 | .066 |
| SE\_SD2 | <--- | RE\_SD2 | 7.211 | .080 |
| SE\_SD2 | <--- | RE\_SD1 | 7.015 | .078 |
| SE\_SD1 | <--- | INJ\_CLEAN | 5.989 | -.102 |
| SE\_SD1 | <--- | RES\_CLEAN | 4.827 | -.109 |
| SE\_SD1 | <--- | BEHAVIOR\_SD\_5 | 4.029 | -.112 |
| SE\_SD1 | <--- | IN\_SD4 | 5.906 | -.072 |
| SE\_SD1 | <--- | Susceptib2 | 8.336 | -.094 |
| SE\_SD1 | <--- | Susceptib3 | 4.038 | -.060 |
| SE\_SD1 | <--- | IN\_SD3 | 4.875 | -.068 |
| SE\_SD1 | <--- | SE\_SD5 | 4.965 | -.105 |
| SE\_SD1 | <--- | SE\_SD4 | 6.989 | .099 |
| SE\_SD1 | <--- | SE\_SD3 | 11.533 | .115 |
| SE\_SD1 | <--- | RE\_SD3 | 4.532 | -.084 |
| SE\_SD1 | <--- | RE\_SD2 | 9.388 | -.122 |
| SE\_SD1 | <--- | RE\_SD1 | 7.046 | -.105 |
| RE\_SD4 | <--- | BEHAVIOR\_SD\_3 | 5.799 | .116 |
| RE\_SD4 | <--- | BEHAVIOR\_SD\_5 | 5.081 | .096 |
| RE\_SD4 | <--- | SE\_SD5 | 7.078 | .096 |
| RE\_SD3 | <--- | BI\_SD1 | 6.984 | .076 |
| DN\_SD3 | <--- | BEHAVIOR\_SD\_1 | 8.137 | .143 |
| DN\_SD3 | <--- | BI\_SD3 | 4.015 | .060 |
| DN\_SD3 | <--- | SE\_SD4 | 4.337 | .063 |

##### Minimization History (Default model)

| Iteration |  | Negative eigenvalues | Condition # | Smallest eigenvalue | Diameter | F | NTries | Ratio |
| --- | --- | --- | --- | --- | --- | --- | --- | --- |
| 0 | e | 28 |  | -.718 | 9999.000 | 7115.036 | 0 | 9999.000 |
| 1 | e\* | 28 |  | -.498 | 4.964 | 3728.137 | 20 | .317 |
| 2 | e\* | 10 |  | -.356 | 1.157 | 2427.650 | 5 | .917 |
| 3 | e | 4 |  | -.328 | .904 | 1645.075 | 5 | .872 |
| 4 | e\* | 1 |  | -.002 | 1.229 | 1090.651 | 6 | .820 |
| 5 | e | 0 | 3107.627 |  | .343 | 973.138 | 5 | .887 |
| 6 | e | 0 | 2208.243 |  | .492 | 925.295 | 4 | .000 |
| 7 | e | 0 | 1672.148 |  | 1.002 | 904.705 | 1 | .415 |
| 8 | e | 1 |  | -.205 | .386 | 895.342 | 1 | .332 |
| 9 | e | 1 |  | -.015 | .137 | 880.345 | 8 | 1.004 |
| 10 | e | 0 | 5547.195 |  | .342 | 877.462 | 8 | .836 |
| 11 | e | 0 | 4817.092 |  | .092 | 877.353 | 1 | 1.068 |
| 12 | e | 0 | 5069.927 |  | .011 | 877.350 | 1 | 1.023 |
| 13 | e | 0 | 5003.896 |  | .001 | 877.350 | 1 | 1.001 |

##### Model Fit Summary

##### CMIN

| Model | NPAR | CMIN | DF | P | CMIN/DF |
| --- | --- | --- | --- | --- | --- |
| Default model | 79 | 877.350 | 386 | .000 | 2.273 |
| Saturated model | 465 | .000 | 0 |
| Independence model | 30 | 6986.712 | 435 | .000 | 16.061 |

##### RMR, GFI

| Model | RMR | GFI | AGFI | PGFI |
| --- | --- | --- | --- | --- |
| Default model | .118 | .839 | .805 | .696 |
| Saturated model | .000 | 1.000 |  |  |
| Independence model | .736 | .171 | .113 | .160 |

##### Baseline Comparisons

| Model | NFI Delta1 | RFI rho1 | IFI Delta2 | TLI rho2 | CFI |
| --- | --- | --- | --- | --- | --- |
| Default model | .874 | .858 | .926 | .915 | .925 |
| Saturated model | 1.000 |  | 1.000 |  | 1.000 |
| Independence model | .000 | .000 | .000 | .000 | .000 |

##### Parsimony-Adjusted Measures

| Model | PRATIO | PNFI | PCFI |
| --- | --- | --- | --- |
| Default model | .887 | .776 | .821 |
| Saturated model | .000 | .000 | .000 |
| Independence model | 1.000 | .000 | .000 |

##### NCP

| Model | NCP | LO 90 | HI 90 |
| --- | --- | --- | --- |
| Default model | 491.350 | 409.114 | 581.299 |
| Saturated model | .000 | .000 | .000 |
| Independence model | 6551.712 | 6284.269 | 6825.571 |

##### FMIN

| Model | FMIN | F0 | LO 90 | HI 90 |
| --- | --- | --- | --- | --- |
| Default model | 2.716 | 1.521 | 1.267 | 1.800 |
| Saturated model | .000 | .000 | .000 | .000 |
| Independence model | 21.631 | 20.284 | 19.456 | 21.132 |

##### RMSEA

| Model | RMSEA | LO 90 | HI 90 | PCLOSE |
| --- | --- | --- | --- | --- |
| Default model | .063 | .057 | .068 | .000 |
| Independence model | .216 | .211 | .220 | .000 |

##### AIC

| Model | AIC | BCC | BIC | CAIC |
| --- | --- | --- | --- | --- |
| Default model | 1035.350 | 1052.124 | 1334.029 | 1413.029 |
| Saturated model | 930.000 | 1028.733 | 2688.046 | 3153.046 |
| Independence model | 7046.712 | 7053.082 | 7160.135 | 7190.135 |

##### ECVI

| Model | ECVI | LO 90 | HI 90 | MECVI |
| --- | --- | --- | --- | --- |
| Default model | 3.205 | 2.951 | 3.484 | 3.257 |
| Saturated model | 2.879 | 2.879 | 2.879 | 3.185 |
| Independence model | 21.816 | 20.988 | 22.664 | 21.836 |

##### HOELTER

| Model | HOELTER .05 | HOELTER .01 |
| --- | --- | --- |
| Default model | 160 | 167 |
| Independence model | 23 | 24 |

##### Execution time summary

|  |  |
| --- | --- |
| Minimization: | .034 |
| Miscellaneous: | 1.543 |
| Bootstrap: | .000 |
| Total: | 1.577 |
